# Supplementary material
Source: PubMed Central journal article supplement (PMC10734428)
Supplement: aem.01772-23-s0001.pdf [file aem.01772-23-s0001.pdf]

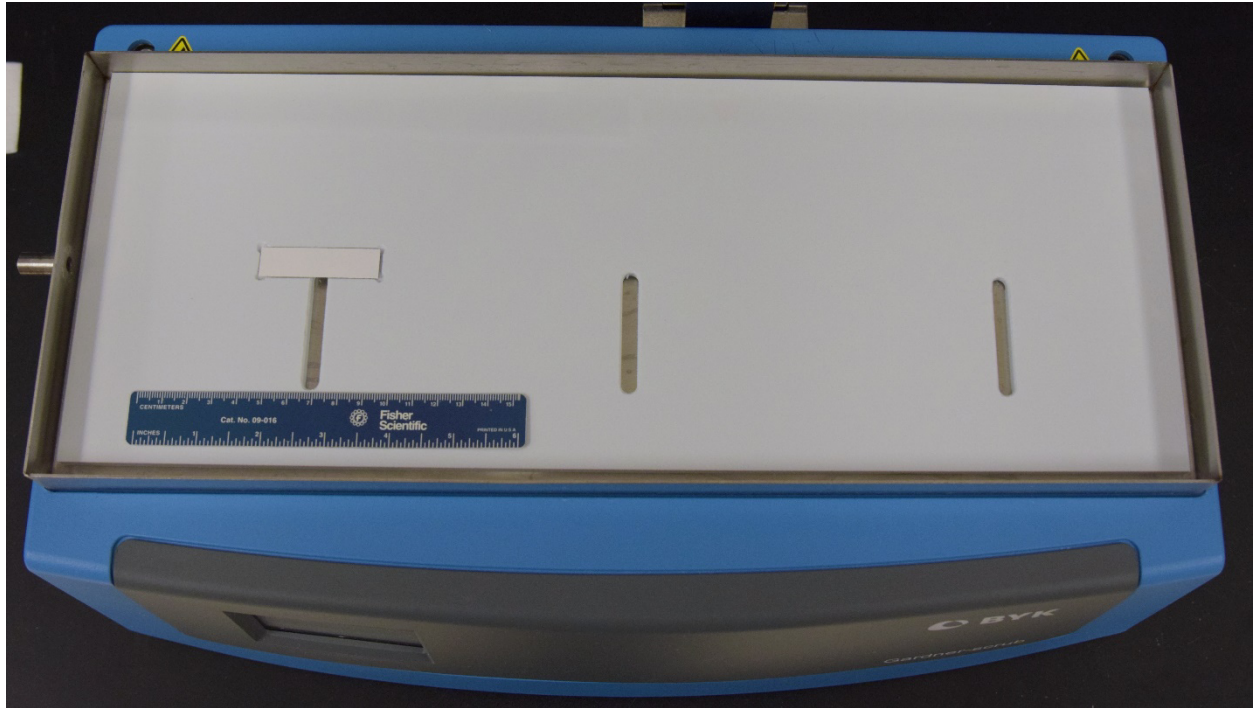

1

2 **Supplementary Figure 1.** Image of acrylic insert placed into tray of the wiping machine. For  
3 demonstration purposes, a blank coupon is shown in the recessed slot on the left side.

4

5

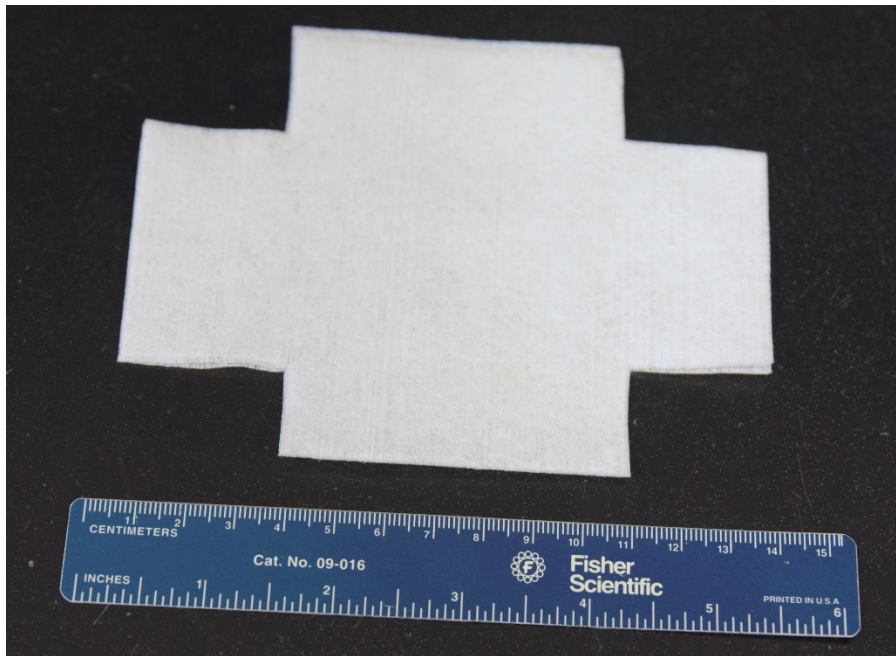

6

7 **Supplementary Figure 2.** Image of prepared paper towel used in wiping experiments.

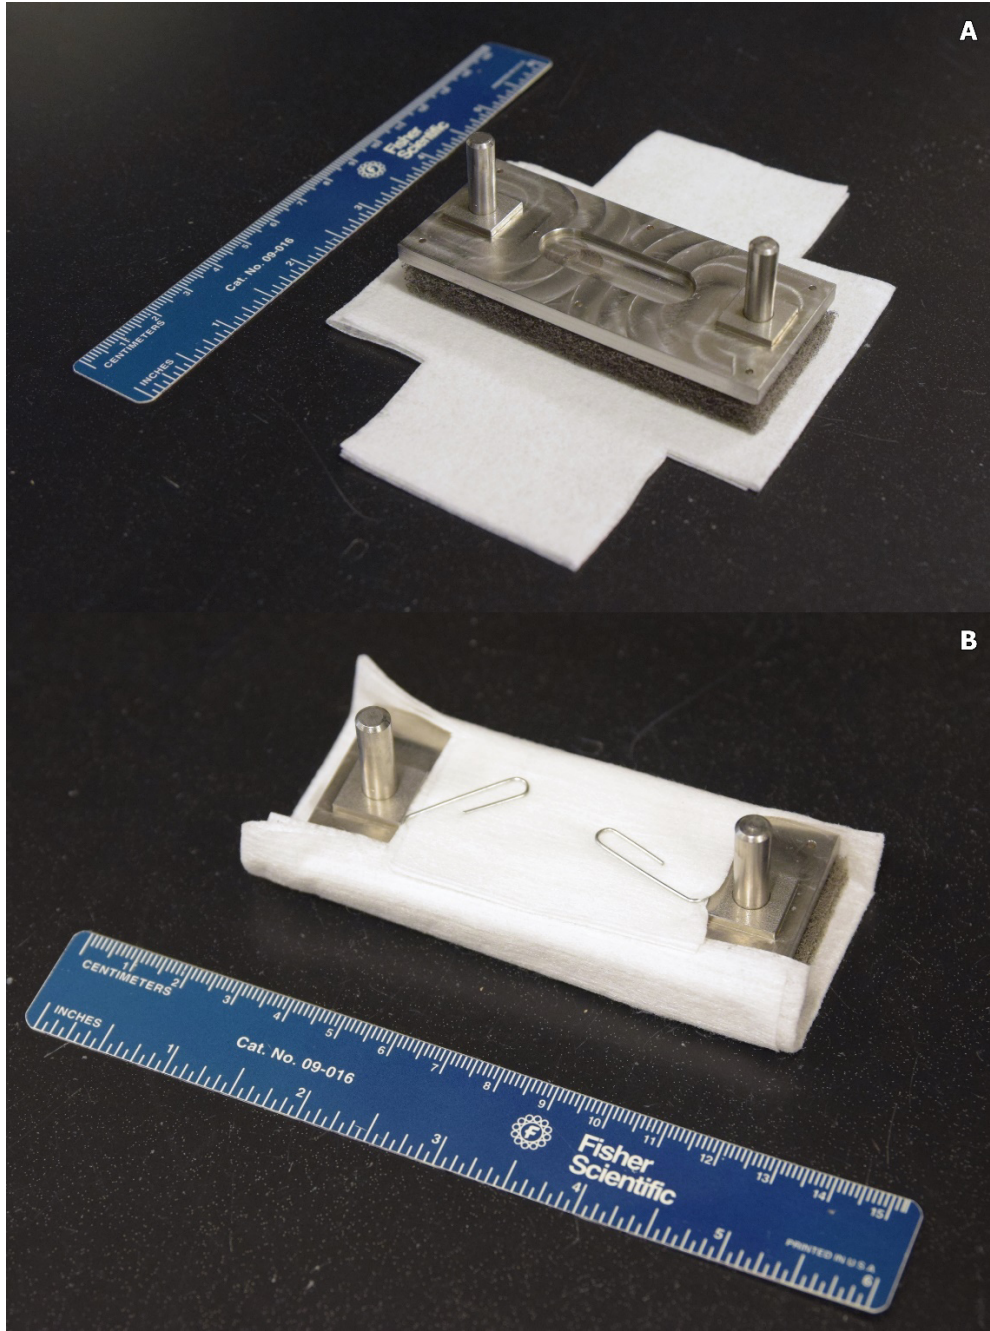

8

9 **Supplementary Figure 3.** Image of wipe assembly head used in wiping experiments. The  
10 Scotch-Brite™ pad is placed between the paper towel and pad holder (A), and the paper towel is  
11 wrapped around the pad holder and secured with paper clips (B).

12

13

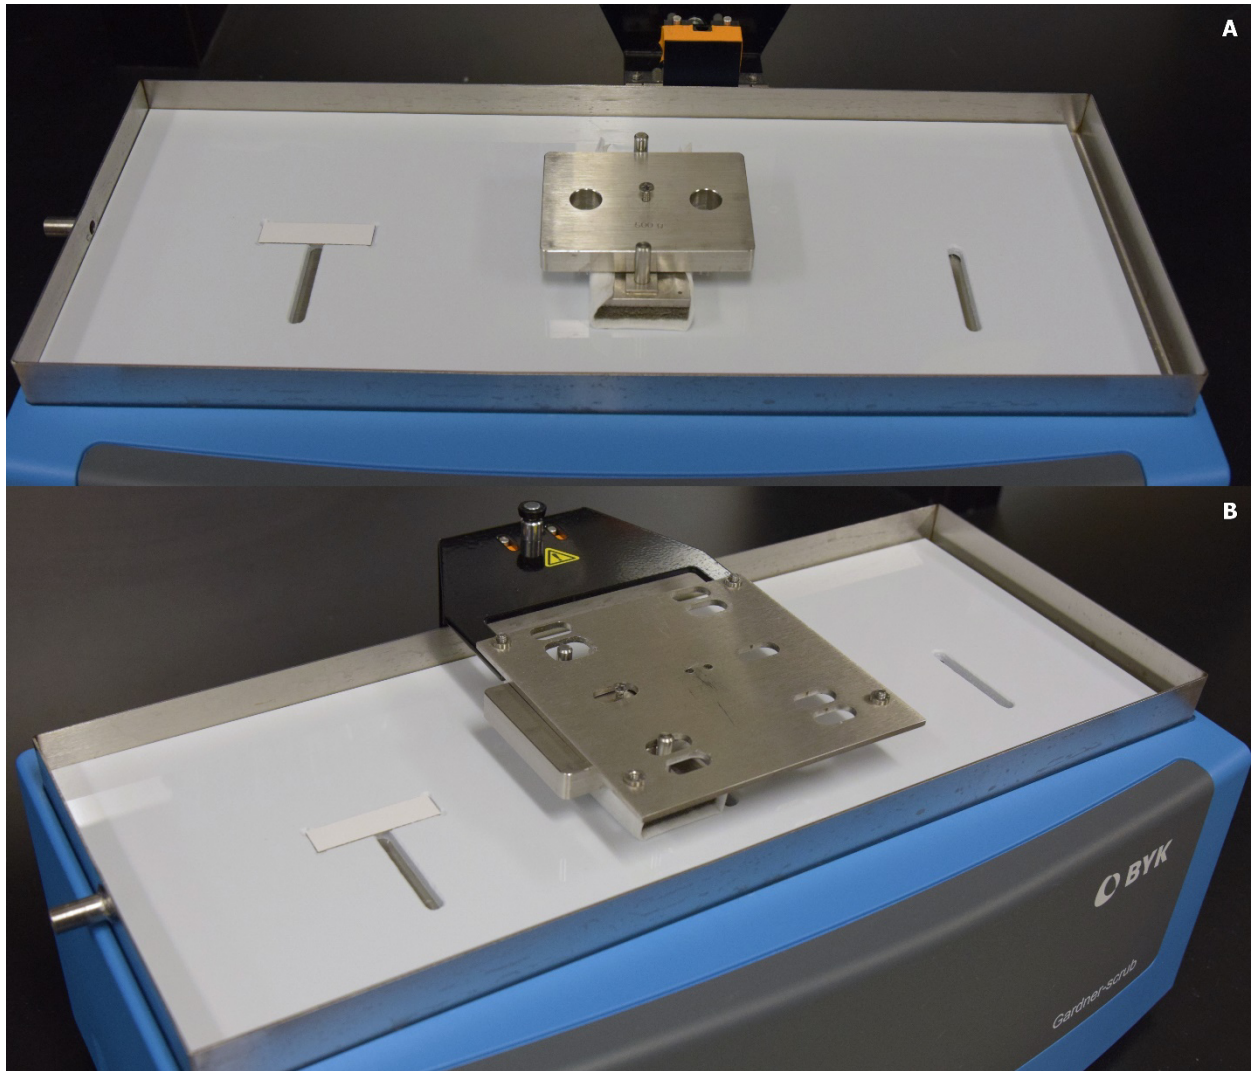

14  
15 **Supplementary Figure 4.** Image of wiping machine experimental setup used for spray and  
16 wiping experiments. The wiping head assembly is placed on the acrylic insert with a 500g mass  
17 placed on top (A), and the rods of the pad holder are positioned in the slots of the wiping arm  
18 (B).

19



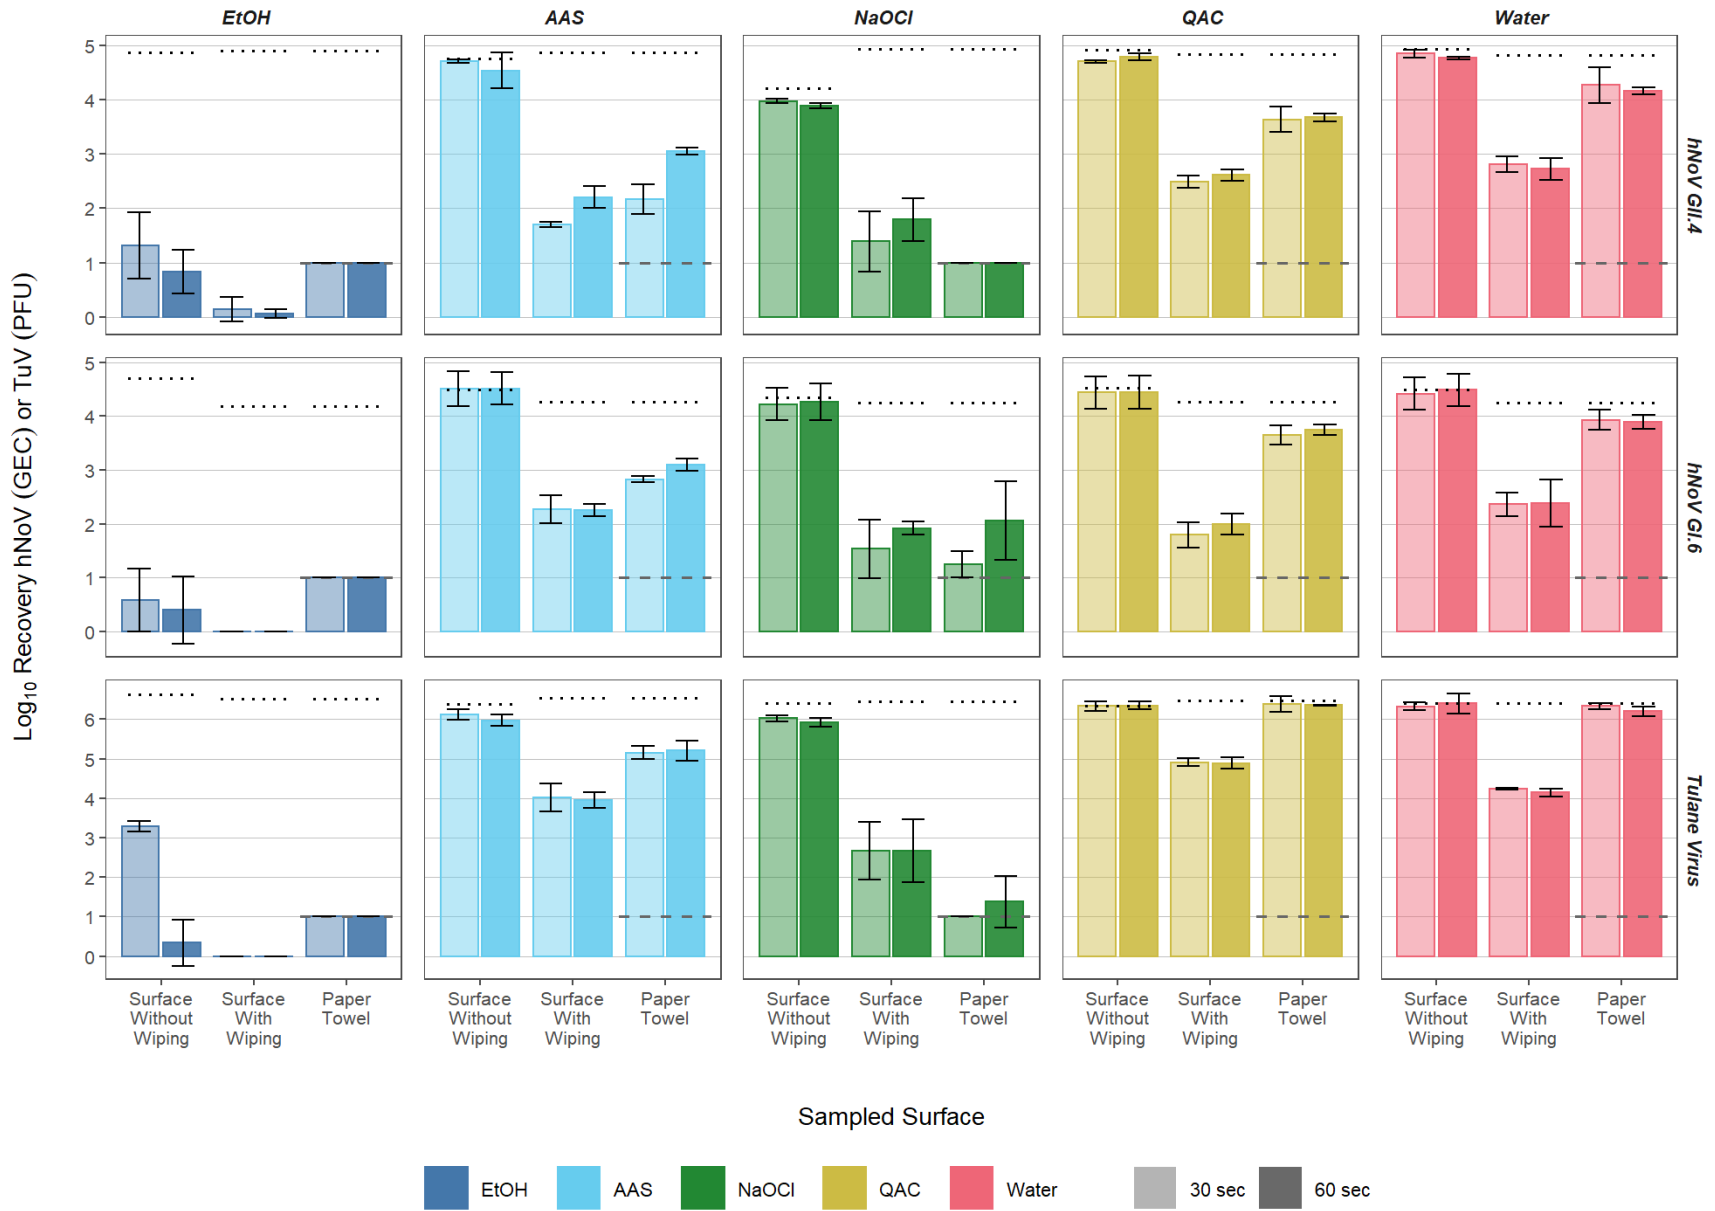

22 **Supplementary Figure 5.** Log<sub>10</sub> recoveries of GII.4 hNoV GEC (top row), GI.6 hNoV GEC  
23 (middle row) and TuV PFU (bottom row) from coupons with and without wiping, and from  
24 paper towels following treatment of virus-laden Formica® surfaces with various disinfectants by  
25 spray application. The dotted line represents the quantity of virus recovered from the neutralized  
26 control for each respective experiment, while the dashed line represents the limit of detection for  
27 virus recovered from paper towels. Bars are the mean of 3 replicates, with error bars  
28 representing standard deviation.

29

| Characteristic                                                   | Sodium hypochlorite-based sanitizer (NaOCl)                                                       | Quaternary Ammonium Compound based sanitizer (QAC)                                                                                                                                                                                                                                                                                                                            | Acid and Anionic Surfactant based sanitizer (AAS)                                                                                                                                                                                                                                                                                                                                                                                                                                                                                                                                                                                                                                   | Ethanol Based Sanitizer (EtOH)                                                                                                                                                                                                                                                                                                                                                                                                                                                                                                                                                                                                                                                                                                                                  |
|------------------------------------------------------------------|---------------------------------------------------------------------------------------------------|-------------------------------------------------------------------------------------------------------------------------------------------------------------------------------------------------------------------------------------------------------------------------------------------------------------------------------------------------------------------------------|-------------------------------------------------------------------------------------------------------------------------------------------------------------------------------------------------------------------------------------------------------------------------------------------------------------------------------------------------------------------------------------------------------------------------------------------------------------------------------------------------------------------------------------------------------------------------------------------------------------------------------------------------------------------------------------|-----------------------------------------------------------------------------------------------------------------------------------------------------------------------------------------------------------------------------------------------------------------------------------------------------------------------------------------------------------------------------------------------------------------------------------------------------------------------------------------------------------------------------------------------------------------------------------------------------------------------------------------------------------------------------------------------------------------------------------------------------------------|
| <b>EPA Toxicity Category, Signal Word, and Hazard Statements</b> | As sold: Category 1 (Danger), Corrosive<br>Causes serious eye damage<br>Causes skin irritation    | As sold: Category 1 (Danger), Corrosive<br>Causes serious eye damage<br>Causes skin irritation                                                                                                                                                                                                                                                                                | As sold: Category 1 (Danger), Corrosive<br>Causes serious eye damage<br>Causes skin irritation                                                                                                                                                                                                                                                                                                                                                                                                                                                                                                                                                                                      | Category IV (No precautionary statements)                                                                                                                                                                                                                                                                                                                                                                                                                                                                                                                                                                                                                                                                                                                       |
| <b>Personal Protective Equipment Requirements</b>                | As sold: protective gloves, protective eyewear, face protection                                   | As sold: protective gloves, protective eyewear, face protection                                                                                                                                                                                                                                                                                                               | As sold: protective gloves, protective eyewear, face protection                                                                                                                                                                                                                                                                                                                                                                                                                                                                                                                                                                                                                     | None                                                                                                                                                                                                                                                                                                                                                                                                                                                                                                                                                                                                                                                                                                                                                            |
| <b>Additional Safety Considerations</b>                          | Strong oxidizer, mixing with other chemicals may create toxic gases                               | -                                                                                                                                                                                                                                                                                                                                                                             | May create toxic gas if mixed with chlorine containing chemicals                                                                                                                                                                                                                                                                                                                                                                                                                                                                                                                                                                                                                    | Combustible (do not store or use near open flame)                                                                                                                                                                                                                                                                                                                                                                                                                                                                                                                                                                                                                                                                                                               |
| <b>Additional microorganism claims at tested dilution</b>        | No additional microorganism kill claims at tested concentration indicated on EPA registered label | Escherichia coli (ATCC 11229)<br>Staphylococcus aureus (ATCC 6538)<br>Klebsiella pneumoniae (ATCC 4352)<br>Listeria monocytogenes (ATCC 19117)<br>Yersinia enterocolitica (ATCC 23715)<br>Enterobacter sakazakii (ATCC12868)<br>Escherichia coli O157:H7 (ATC 35150)<br>Shigella sonnei (ATCC 11060)<br>Salmonella enterica (ATCC 10708)<br>Campylobacter jejuni (ATCC 33291) | <i>Bacteria</i><br>Staphylococcus aureus ATCC 6538<br>Escherichia coli ATCC 11229<br>Salmonella enterica ATCC 10708<br>Escherichia coli O157:H7 ATCC 35150<br>Listeria monocytogenes ATCC 19117<br>Campylobacter jejuni ATCC 33291<br>Shigella flexneri ATCC 29508<br>Shigella sonnei ATCC 11060<br>Yersinia enterocolitica ATCC 23715<br>Cronobacter sakazakii ATCC 12868<br>Staphylococcus aureus Community acquired Methicillin Resistant (MRSA) ATCC BAA-1683<br><br><i>Viruses</i><br>Norovirus (Feline calicivirus surrogate) ATCC VR-782, Strain F-9<br>Influenza A H3N2 ATCC VR-544<br>Influenza A H1N1 ATCC VR-1736<br>Influenza B ATCC VR-1535<br>Rhinovirus ATCC VR-1607 | <i>Bacteria</i><br>Acinetobacter baumannii ATCC 19606<br>Bordetella pertussis ATCC 12743<br>Campylobacter jejuni ATCC 43451<br>Escherichia coli ATCC 11229<br>Enterobacter aerogenes ATCC 13048<br>Enterococcus faecium ATCC 51559<br>Klebsiella pneumoniae ATCC 4352<br>Listeria monocytogenes ATCC 49594<br>Methicillin-resistant Staphylococcus aureus ATCC 33591<br>Mycobacterium bovis var. BCG (TB)<br>Pseudomonas aeruginosa ATCC 15442<br>Salmonella enterica ATCC 10708<br>Staphylococcus aureus ATCC 6538<br>Streptococcus pneumoniae ATCC 6305<br>Streptococcus pyogenes ATCC 12344<br>Vancomycin Resistant Enterococcus faecalis ATCC 51575<br>Vibrio vulnificus ATCC 27562<br>Yersinia enterocolitica ATCC 9610<br>Staphylococcus aureus ATCC 6538 |

|                                        |    |    |                                                                                                                    |                                                                                                                                                                                                                                                                                                                                                                                                                                                                                                                                                                                                                                                                                                                                                                                                                                                                                                                                                                                                                                                                                                |
|----------------------------------------|----|----|--------------------------------------------------------------------------------------------------------------------|------------------------------------------------------------------------------------------------------------------------------------------------------------------------------------------------------------------------------------------------------------------------------------------------------------------------------------------------------------------------------------------------------------------------------------------------------------------------------------------------------------------------------------------------------------------------------------------------------------------------------------------------------------------------------------------------------------------------------------------------------------------------------------------------------------------------------------------------------------------------------------------------------------------------------------------------------------------------------------------------------------------------------------------------------------------------------------------------|
|                                        |    |    | <p>SARS – Related Coronavirus 2 (SARS-CoV-2) BEI Resources NR-52281, Strain Isolate USA-WA 1/2020 (15 seconds)</p> | <p>Pseudomonas aeruginosa ATCC 15442</p> <p><b>Yeast/Fungi</b><br/> Aspergillus niger ATCC 6275<br/> Candida albicans ATCC 10231<br/> Trichophyton interdigitale ATCC 9533</p> <p><b>Viruses</b><br/> 2009-H1N1 Influenza A/California/04/09<br/> Avian Influenza H7N9 Strain wildtype A/Anhui/1/2013, CDC # 2013759189<br/> Avian Influenza H5N1 Strain VN/5N1-PR8/CDC-RG, CDC #2006719965<br/> Herpes simplex virus [type 1] ATCC VR-733, Strain F(1)<br/> Human Coronavirus [Strain 229E] ATCC VR-740<br/> Mumps ATCC VR-1438, Strain Jones<br/> SARS-CoV-2 USA-WA1/2020<br/> Canine Parvovirus ATCC VR-2017<br/> Coxsackie virus type B3 ATCC VR-30, Strain Nancy<br/> Enterovirus type D68 ATCC VR-1825, Strain US/KY/14-18953<br/> Murine norovirus MNV-G, Yale University<br/> Feline Calicivirus ATCC VR-782<br/> Polio Type 1 [virus] ATCC VR-1562<br/> Respiratory syncytial virus ATCC VR-26<br/> Rhinovirus ATCC VR-284<br/> Rotavirus ATCC VR-2018<br/> Human Hepatitis B virus Grimaud<br/> Human Hepatitis C virus NADL<br/> Human immunodeficiency virus Type I Strain IIB</p> |
| <b>Soft Surface Sanitization Claim</b> | No | No | No                                                                                                                 | Yes                                                                                                                                                                                                                                                                                                                                                                                                                                                                                                                                                                                                                                                                                                                                                                                                                                                                                                                                                                                                                                                                                            |
